# Supplementary material for: Biocompatible and biodegradable polymersomes for pH-triggered drug release
Source: Royal Society of Chemistry journal article supplement (doi:10.1039/c1sm05308f), 2011-01-01
Supplement: c1sm05308f.pdf [file c1sm05308f.pdf]

*Electronic Supplementary Information*

**Biocompatible and Biodegradable Polymersomes for pH-triggered release of Anti-cancer Drug**

Gong-Yan Liu, Li-Ping Lv, Chao-Jian Chen, Xiang-Sheng Liu, Xiao-Fen Hu, Jian Ji\*

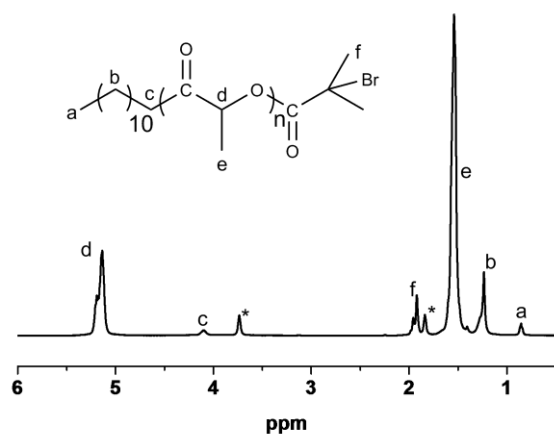

Figure S1. Chemical structure and  $^1\text{H}$  NMR spectra of PLA-Br.

a)

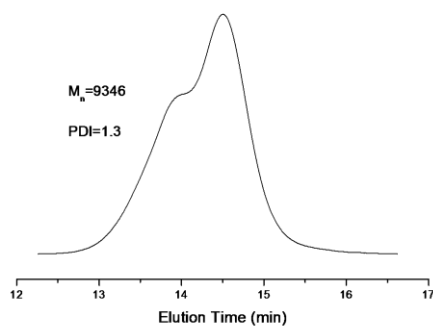

b)

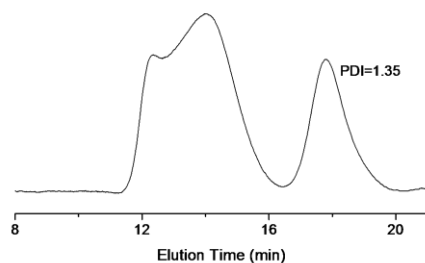

**Fig. S2** GPC traces of PLA-Br (a) and PLA<sub>126</sub>-b-PMPC<sub>36</sub> diblock copolymers (b).

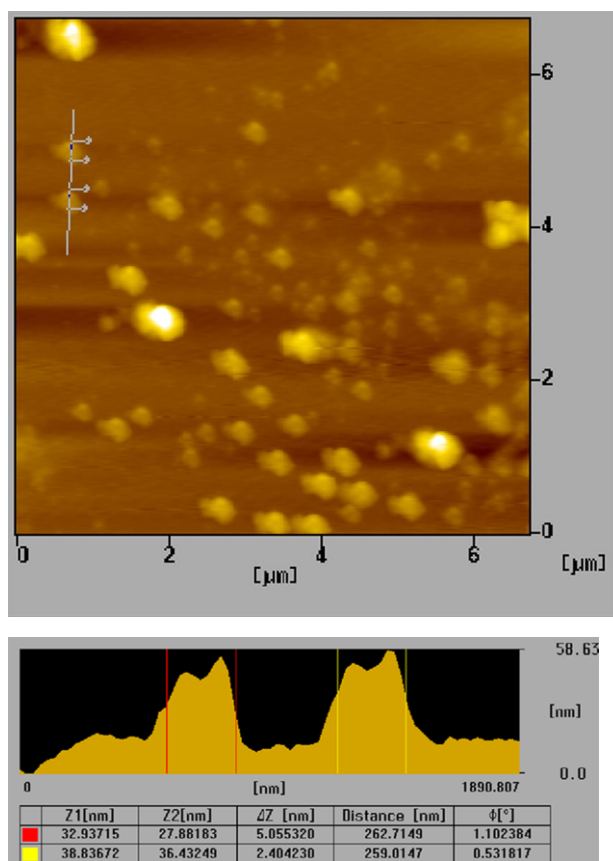

**Fig. S3** AFM image of PLA-b-PMPC polymersomes.

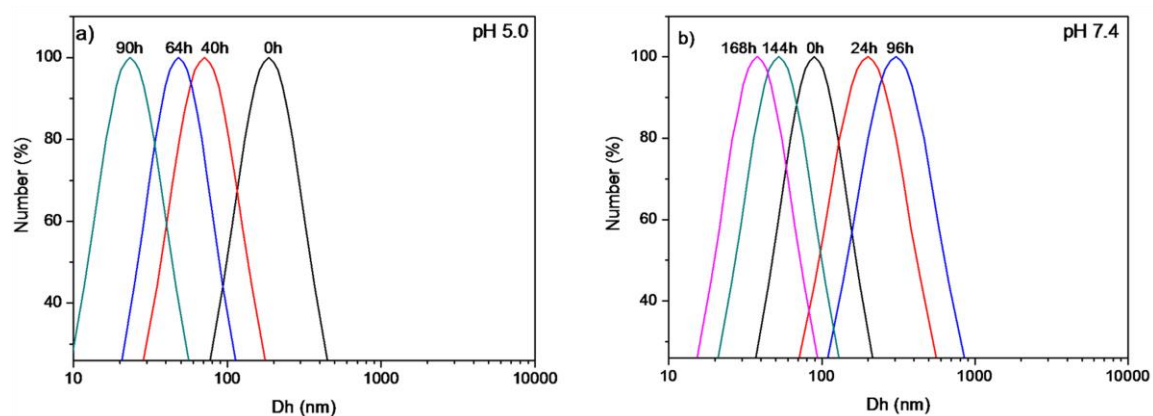

**Fig. S4** The size distribution of PLA-b-PMPC aggregates in pH 5.0 PBS (a) and pH 7.4 PBS (b), at various degradation times at 37 °C.

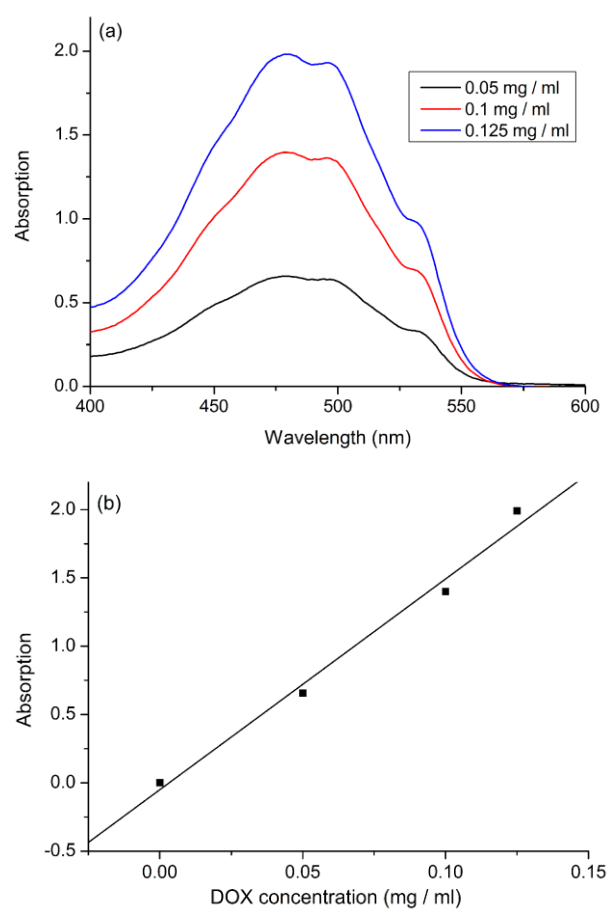

**Fig. S5** Calibration curve of DOX in the mixture of DMSO and CH<sub>3</sub>OH solutions (1:1, V:V) with different DOX concentrations.
